# Supplementary material
Source: PubMed Central journal article supplement (PMC7397469)
Supplement: f-76-00372-sup1.pdf [file f-76-00372-sup1.pdf]

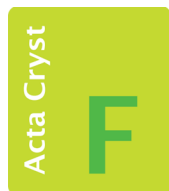

STRUCTURAL BIOLOGY  
COMMUNICATIONS

**Volume 76 (2020)**

**Supporting information for article:**

**Structural characterization of three noncanonical NTF2-like  
superfamily proteins: implications for polyketide biosynthesis**

**Nemanja Vuksanovic, Xuechen Zhu, Dante A. Serrano, Vilja Siitonen, Mikko  
Metsä-Ketelä, Charles E. Melançon and Nicholas R. Silvaggi**

## S1. Additional Materials and Methods

### S1.1. Sequences of synthesized gBlocks

#### S1.1.1. Synthesized ActVI-ORFA coding sequence (5'-3'):

GGTCTCAAGGTATGACGATTACCGCGCTGCCAACTGGACTTTATGCTGAAGTGTTGAGCTTTTATGGTCA  
TCAGATGCAGAAGTTGGATGGGCGCGATTTTGCCGGGTATGCCGCCACCTTCACCGAAGATGGTGAATT  
CCGTCACAGCCCTTCACTTCCGGCGGGCGCATACCCGTGCGGGCATTACCGCCGTGCTGGAAGATTTCCA  
TCGCAAGTTCGACGCACGAAAATCCAGCGCCGCCATTGGTTTGACCATACTGCCCTGTCTCAAGCGAGT  
GATGGTCTATTACCGCCACCAGTACTGCTTGGTGCTGACGGTACACGCGGATGTGAAAGCGCCGGAG  
TTCGGGCCAAGTTGCTTAGTGCATGATGTTTTGGTGCGCGGTGCGGATGGTGAATTACTGCGCTCCC  
GCCATGTCACACATGACCATGTCTTCCCAGCCTGATGATCTAGAGC

#### S1.1.2. Synthesized Aln2 coding sequence (5'-3'):

GGATGACTACCGATGAAACTACCACCACAGATGCAACTACGATTACTGATGCGACAACGATTGCCGATGC  
AACCACGCGGAACGCCCCCTAAATTGCCCTCTCCAGAGTTGTACGTGCGAAGTCACTCAGTTTTATGCTCGT  
CAAATGCACCGTATGGACGGTGATGATTTCCGAGGGTTTGC GGCGACTTTCGTAGCCGGTGCCGAATTTA  
GATTGGCAGGCGGTACTGTTCTGACTGGCCCAGAGGCCATAGAAGCTGGTGCGAGAGCGGCAGCAGGA  
CGCTTCGACGGGGCCCAGCCCCGGCACTGGTTTGACATGATGACTGTAGAGGAGGCGGACGACGGAAC  
GGTGTCGACTTCTTATTACGCGACTGTGACTGTTACGTCCGCCAAGGGGCTGTCCCTGTAGAACCTACG  
TGCTTTGTGCGGGACACTTTAGTTCGTGTCTCCGGAGTACTTAGATCCC GTTCTCGTGTAATTGAAAGAGA  
CGACTTAGTTGTACGTGCTCGGACTCAAGGTTGAAA

### S1.2. Size exclusion chromatography of ActVI-ORFA

The molecular weight of ActVI-ORFA was estimated by gel filtration chromatography using a Superdex S200 10/300 GL (10 x 300 mm) (GE Healthcare Life Sciences, Chicago, USA). The calibration curve was constructed using bovine catalase (233.1 kDa), alcohol dehydrogenase from *Saccharomyces cerevisiae* (149.5 kDa), bovine serum albumin (66.5 kDa) and hen egg lysozyme (14.4 kDa). The standards were run at 0.5 mL/min using 20 mM TRIS pH 8.0, 150mM NaCl as a mobile phase. The ActVI-ORFA sample (10 mg/mL) was run under the same conditions.



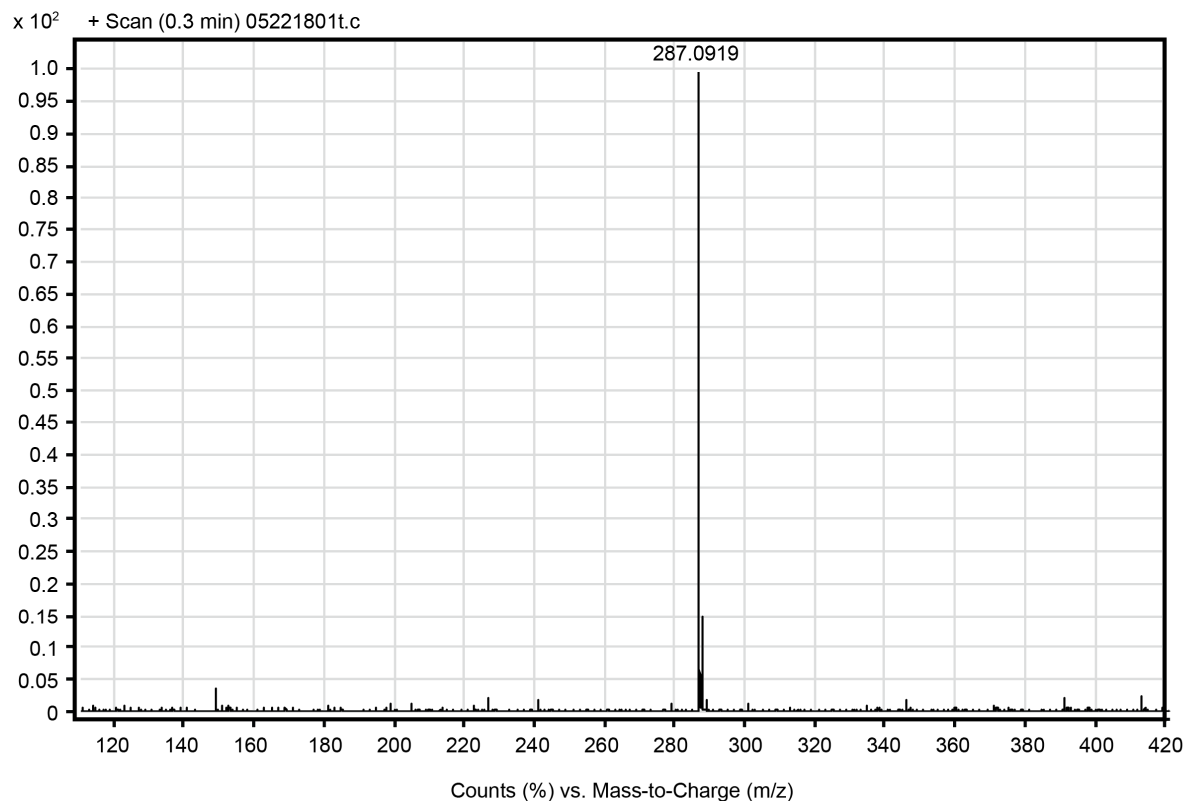

**Figure S2** High-resolution mass spectrum of isolated (*S*)-DNPA peak in methanol using electrospray ionization in positive ionization mode by the Waters GCT (2008) high resolution mass spectrometer facility at University of California at Riverside. HRMS (ESI)  $m/z$  calculated for (*S*)-DNPA  $[M+H]^+$ : 287.0920, observed: 287.0919.

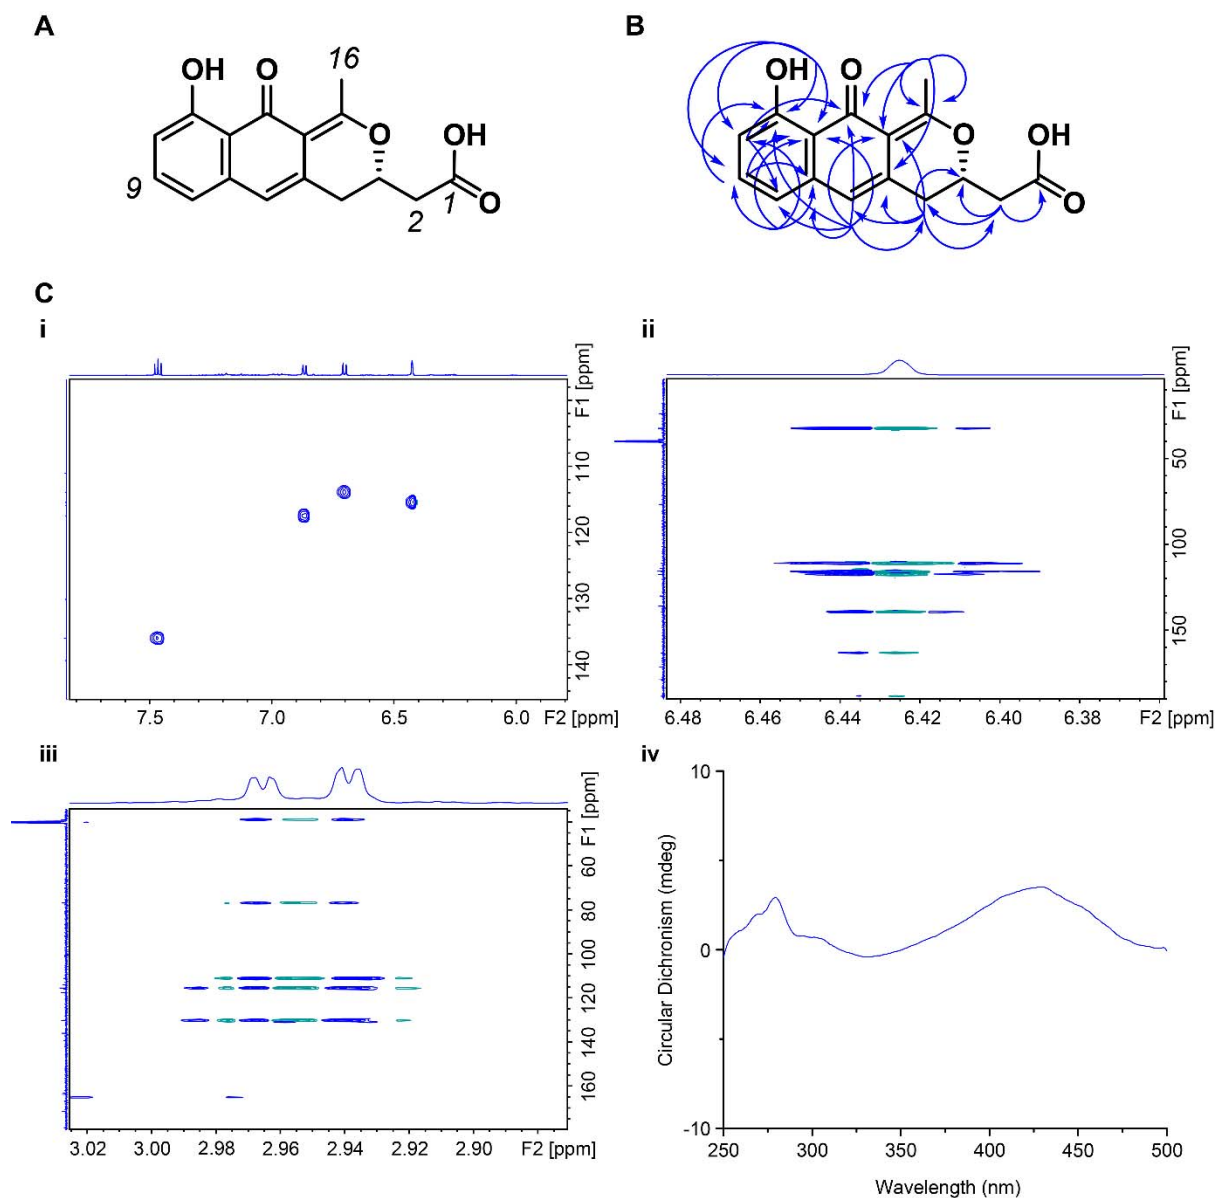

**Figure S3** Characterization of (*S*)-DNPA isolated from M1152::pXZ11 R4 crude extract. (A) Molecular structure of (*S*)-DNPA (compound **5** in the article) showing atom numbering (Ichinose et al., 1999). (B) HMBC correlations. (C) Relevant features of the compound shown in the selected spectra: i) HSQCDE signals for the aromatic protons; ii) HMBC signals from H6 ( $\delta$  6.43) to C4, C7, C8, C11, C12, C13 and C14 showing the major part of the compound; iii) HMBC signals from H4 ( $\delta$  2.95) to C2, C3, C5, C6 and C14 showing that the acetic acid is attached to the backbone; iv) CD spectrum collected in methanol from 250 nm to 500 nm, indicating the *S* configuration (Taguchi et al., 2001).

**Table S1** Chemical shifts and J-couplings observed in  $^1\text{H}$  and  $^{13}\text{C}$  NMR data collected on 600 MHz ( $^1\text{H}$ ,  $^{13}\text{C}$  and HMBC) and 500 MHz (HSQCDE) instruments

Abbreviations used in NMR data annotation: s for singlet, m for multiplet, dd for doublet of doublets, ddd for doublet of doublet of doublets and br for broad. The integrals are  $^1\text{H}$  unless otherwise stated.

| Position | $\delta$ ppm    | $\delta$ ppm, J Hz       |
|----------|-----------------|--------------------------|
|          | $^{13}\text{C}$ | $^1\text{H}$             |
| 1        | 171.5           |                          |
| 1-OH     |                 | 12.61 s                  |
| 2        | 38.9            | 2.78 m*, 2H              |
| 3        | 76.7            | 4.73 m                   |
|          |                 | 2.95 ddd, 0.8; 3.4; 15.9 |
| 4        | 32.4            | 2.80 m*                  |
| 5        | 130.1           |                          |
| 6        | 115.4           | 6.43 br                  |
| 7        | 139.3           |                          |
| 8        | 117.5           | 6.87 dd, 0.9; 7.7        |
| 9        | 136.0           | 7.47 dd, 7.7; 8.3        |
| 10       | 113.9           | 6.70 dd, 0.9; 8.3        |
| 11       | 163.2           |                          |
| 11-OH    |                 | 14.05 br                 |
| 12       | 115.9           |                          |
| 13       | 188.5           |                          |
| 14       | 111.0           |                          |
| 15       | 178.9           |                          |
| 16       | 23.8            | 2.58 s, 3H               |

## References

- Gomez-Escribano, J. P., and Bibb, M. J. (2011). *Microb. Biotechnol.* **4**, 207-215.
- Ichinose, K., Surti, C., Taguchi, T., Malpartida, F., Booker-Milburn, K. I., Stephenson, G. R., Ebizuka, Y., and Hopwood, D. A. (1999). *Bioorg. Med. Chem. Lett.* **9**, 395-400.
- Taguchi, T., Ebizuka, Y., Hopwood, D. A., and Ichinose, K. (2001). *J. Am. Chem. Soc.* **123**, 11376-11380.
